# Supplementary material for: Impact of Red Blood Cells on Function and Metabolism of Porcine Deceased Donor Kidneys During Normothermic Machine Perfusion
Source: PubMed Central journal article supplement — Transplantation. 2022 Aug 27;106(6):1170-1179. doi: 10.1097/TP.0000000000003940 (PMC9128616; doi:10.1097/tp.0000000000003940), 2022-08-27
Supplement: tp-106-1170-s001.pdf [file tp-106-1170-s001.pdf]

**Figure S1**

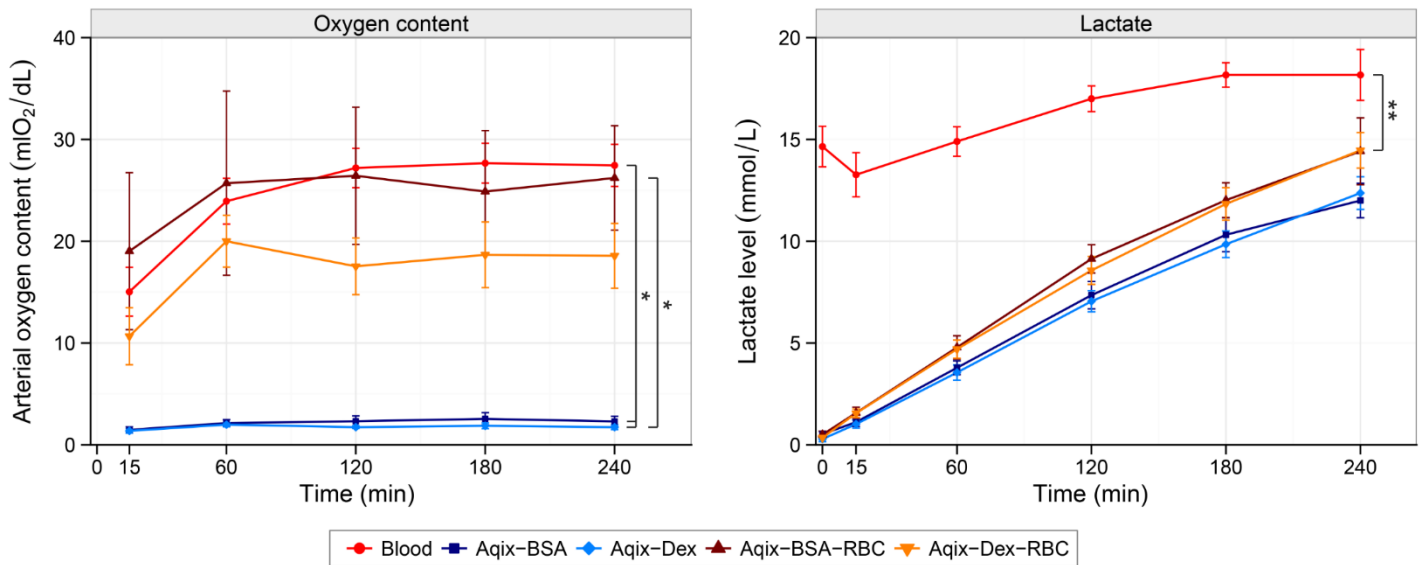

**Figure S1.** Oxygen and lactate measurements. Porcine kidneys were perfused for 4 hours with blood (control), with Aqix supplemented with a colloid (2.2% BSA or 3.5% Dextran 40), or Aqix with a colloid (BSA or Dextran 40) and RBC. **(A)** arterial oxygen content, \* $p=0.045$  control versus Aqix-BSA and Aqix-Dex ( $p>0.01$ ) and Aqix-BSA-RBC versus Aqix-Dex ( $p>0.01$ ) **(B)** arterial lactate during 4 hours NMP, \*\* $p=0.002$  Control versus Aqix-Dex-RBC. Every group contains 6 kidneys. BSA, bovine serum albumin; Dex, dextran 40; RBC, red blood cells; NMP, normothermic machine perfusion. Data are presented as mean  $\pm$  SEM.

**Figure S2**

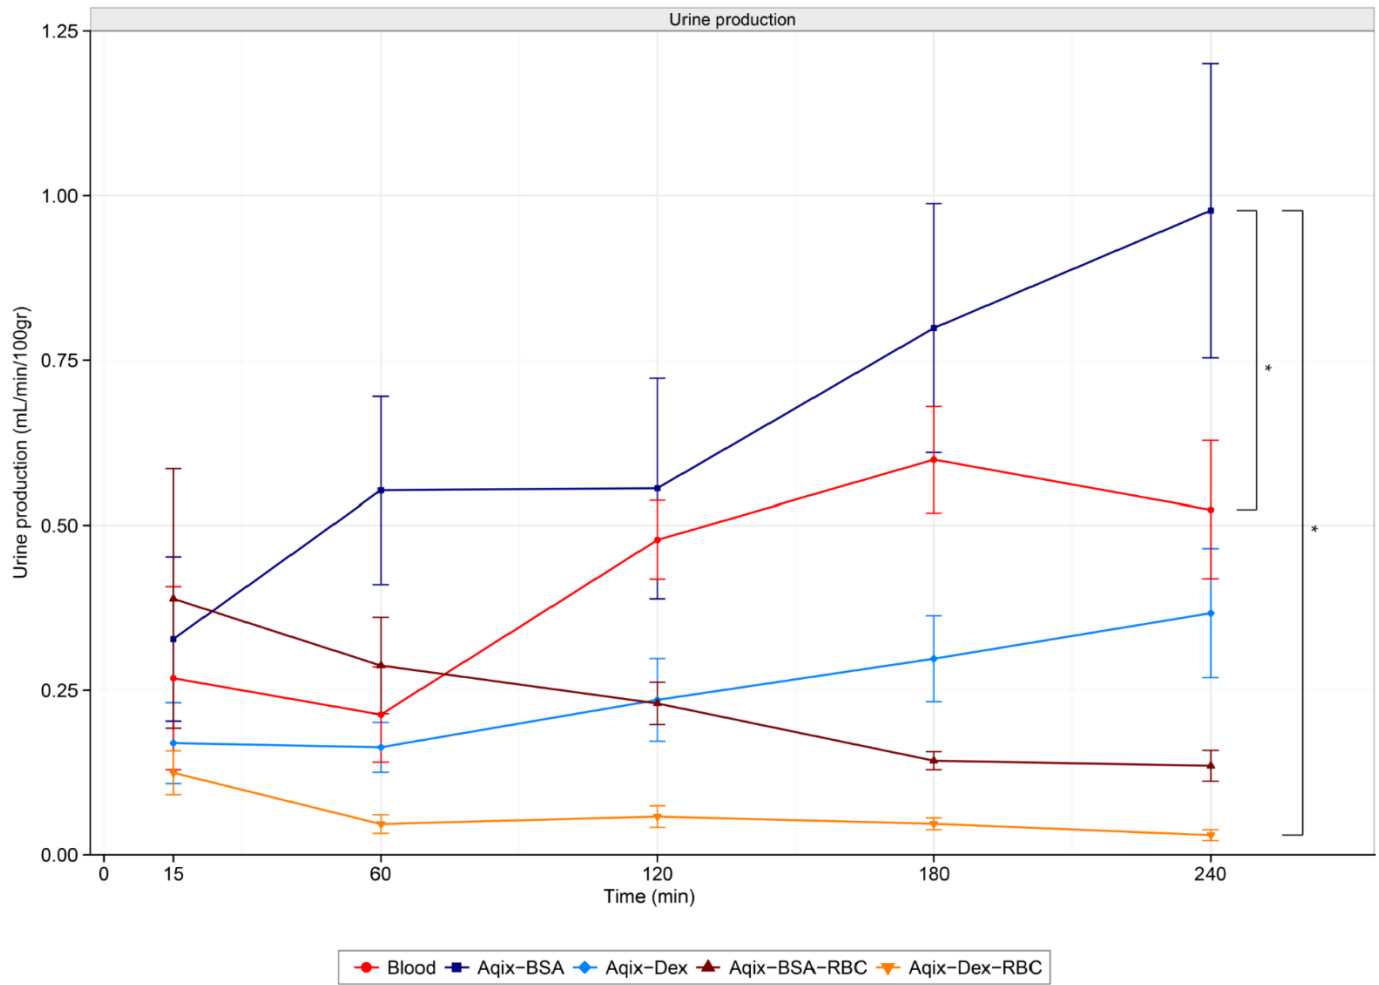

**Figure S2.** Urine production over time. Porcine kidneys were perfused for 4 hours with blood (control), with Aqix supplemented with a colloid (2.2% BSA or 3.5% Dextran 40), or Aqix with a colloid (BSA or Dextran 40) and RBC. (A) urine flow. Every group contains 6 kidneys. BSA, bovine serum albumin; Dex, dextran 40; RBC, red blood cells; NMP, normothermic machine perfusion. Data are presented as mean  $\pm$  SEM.

**Figure S3**

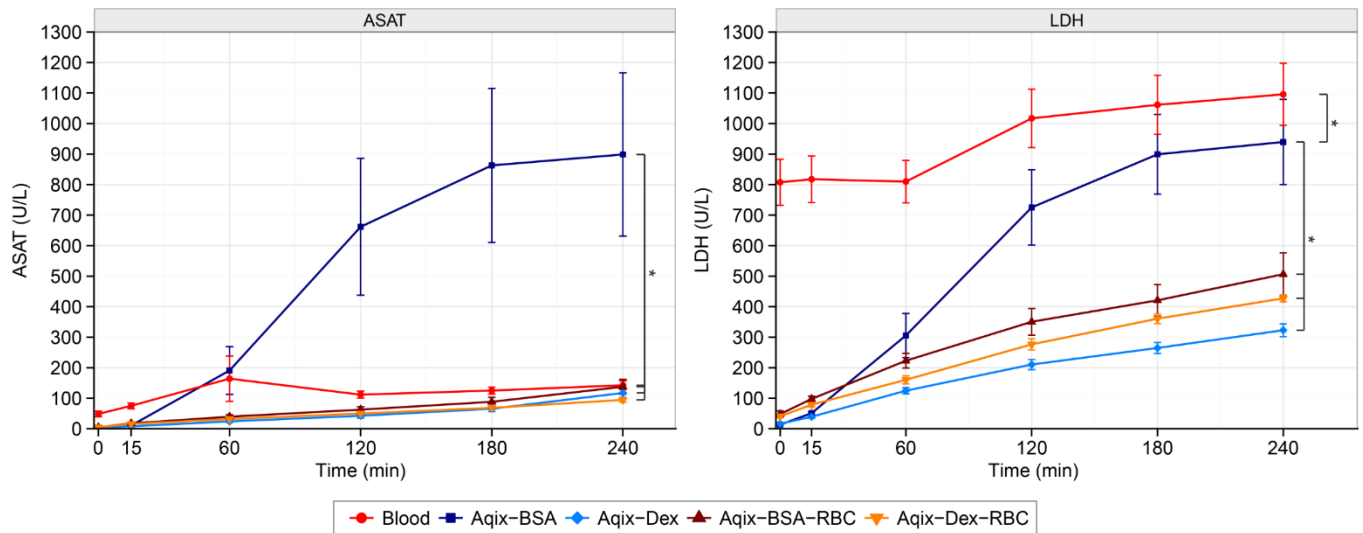

**Figure S3.** Injury markers ASAT and LDH over time. Porcine kidneys were perfused for 4 hours with blood (control), with Aqix supplemented with a colloid (2.2% BSA or 3.5% Dextran 40), or Aqix with a colloid (BSA or Dextran 40) and RBC. **(A)** ASAT,  $*p < 0.001$ , **(B)** LDH,  $*p < 0.001$  between Aqix-BSA and all other groups. Every group contains 6 kidneys. BSA, bovine serum albumin; Dex, dextran 40; RBC, red blood cell; ASAT, aspartate aminotransferase; LDH, lactate dehydrogenase; NMP, normothermic machine perfusion. Data are presented as mean  $\pm$  SEM.

**Figure S4**

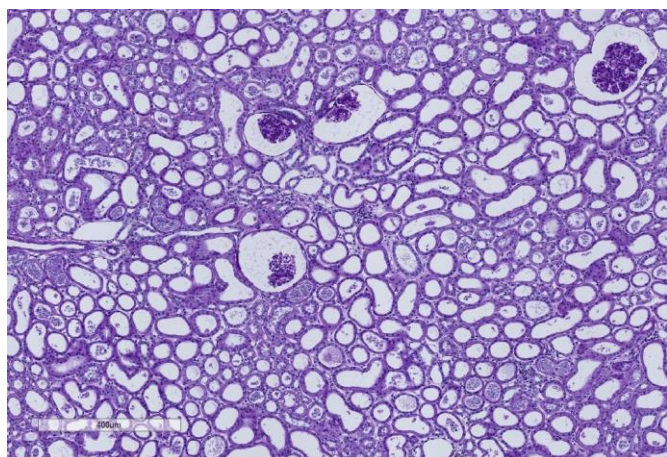

**Blood:** Median percentage of damage in this group: 10%

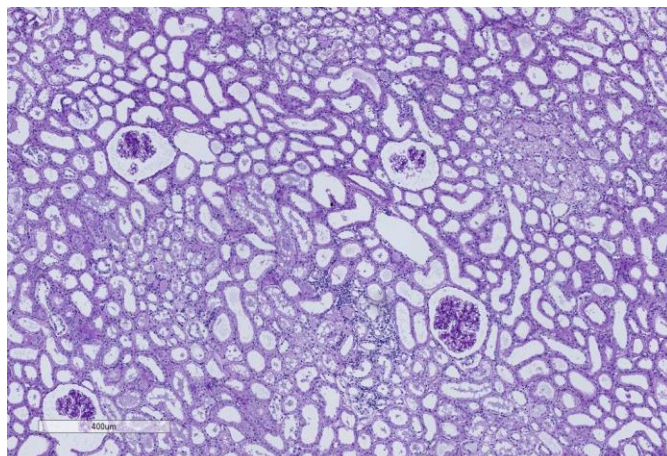

**Aqix+BSA:** Median percentage of damage in this group: 38%

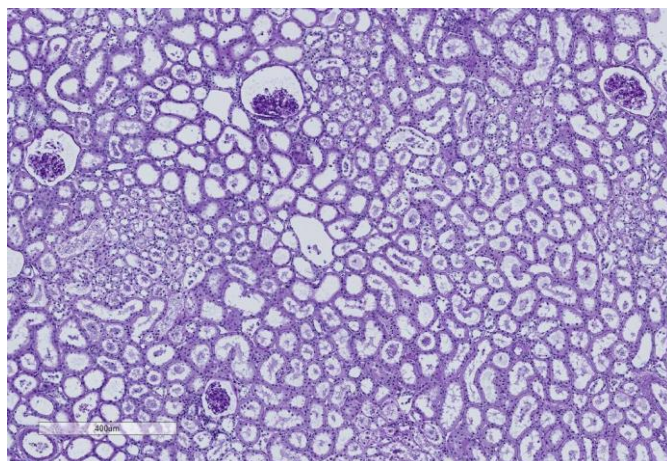

**Aqix+Dex:** Median percentage of damage in this group: 50%

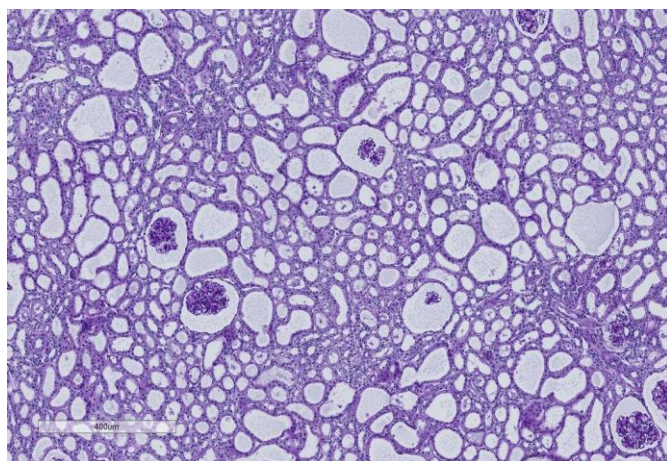

**Aqix+BSA+RBC:** Median percentage of damage in this group: 7%

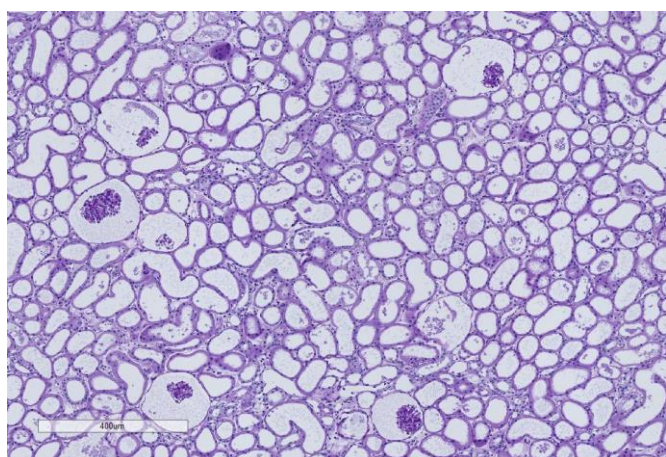

**Aqix+Dex+RBC:** Median percentage of damage in this group: 18%

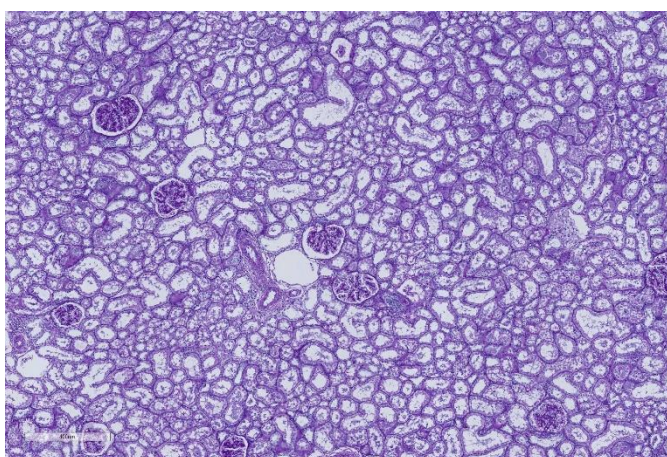

**Negative control:** Median percentage of damage in this group: 1%
